# Supplementary material
Source: PubMed Central journal article supplement (PMC6881797)
Supplement: AEM.02098-19-s0001.pdf [file AEM.02098-19-s0001.pdf]

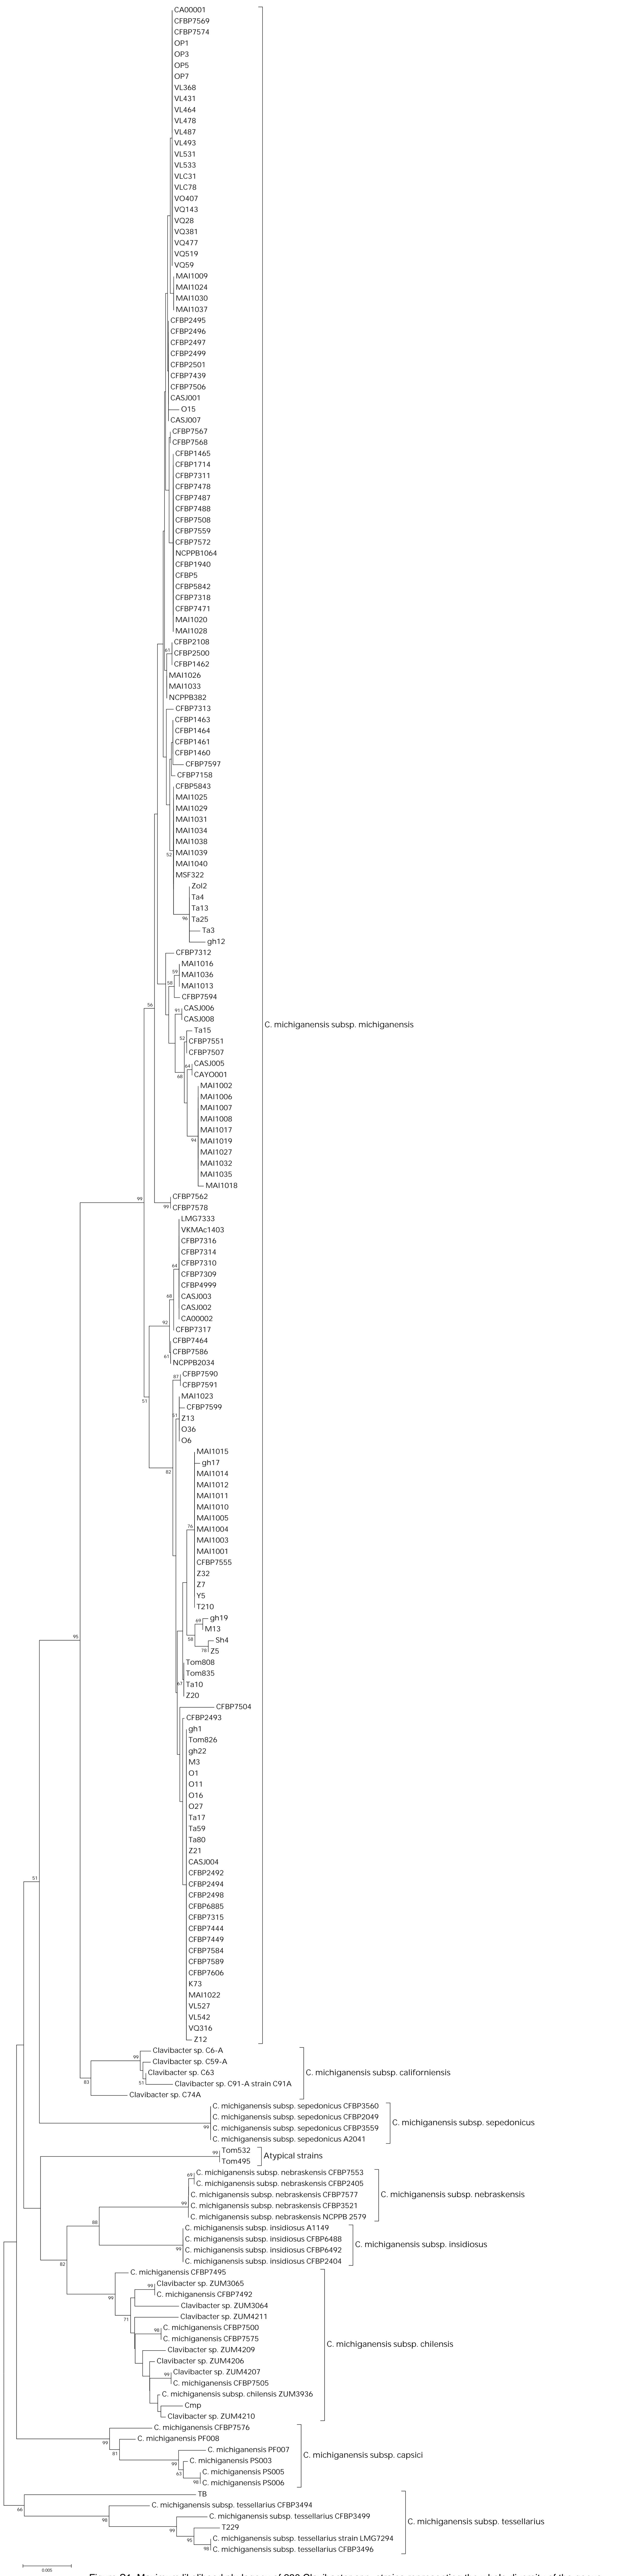

Figure S1: Maximum likelihood phylogeny of 230 *Clavibacter* spp. strains representing the whole diversity of the genus based on the concatenated sequences of four housekeeping genes (i.e. atpD, gyrB, ppk, and recA). *Clavibacter michiganensis* subsp. *michiganensis* strains were clustered as a monophyletic clade close to the non-pathogenic subspecies *C. michiganensis* subsp. *californiensis*.

## Phylogroup I: Post-1984 strains

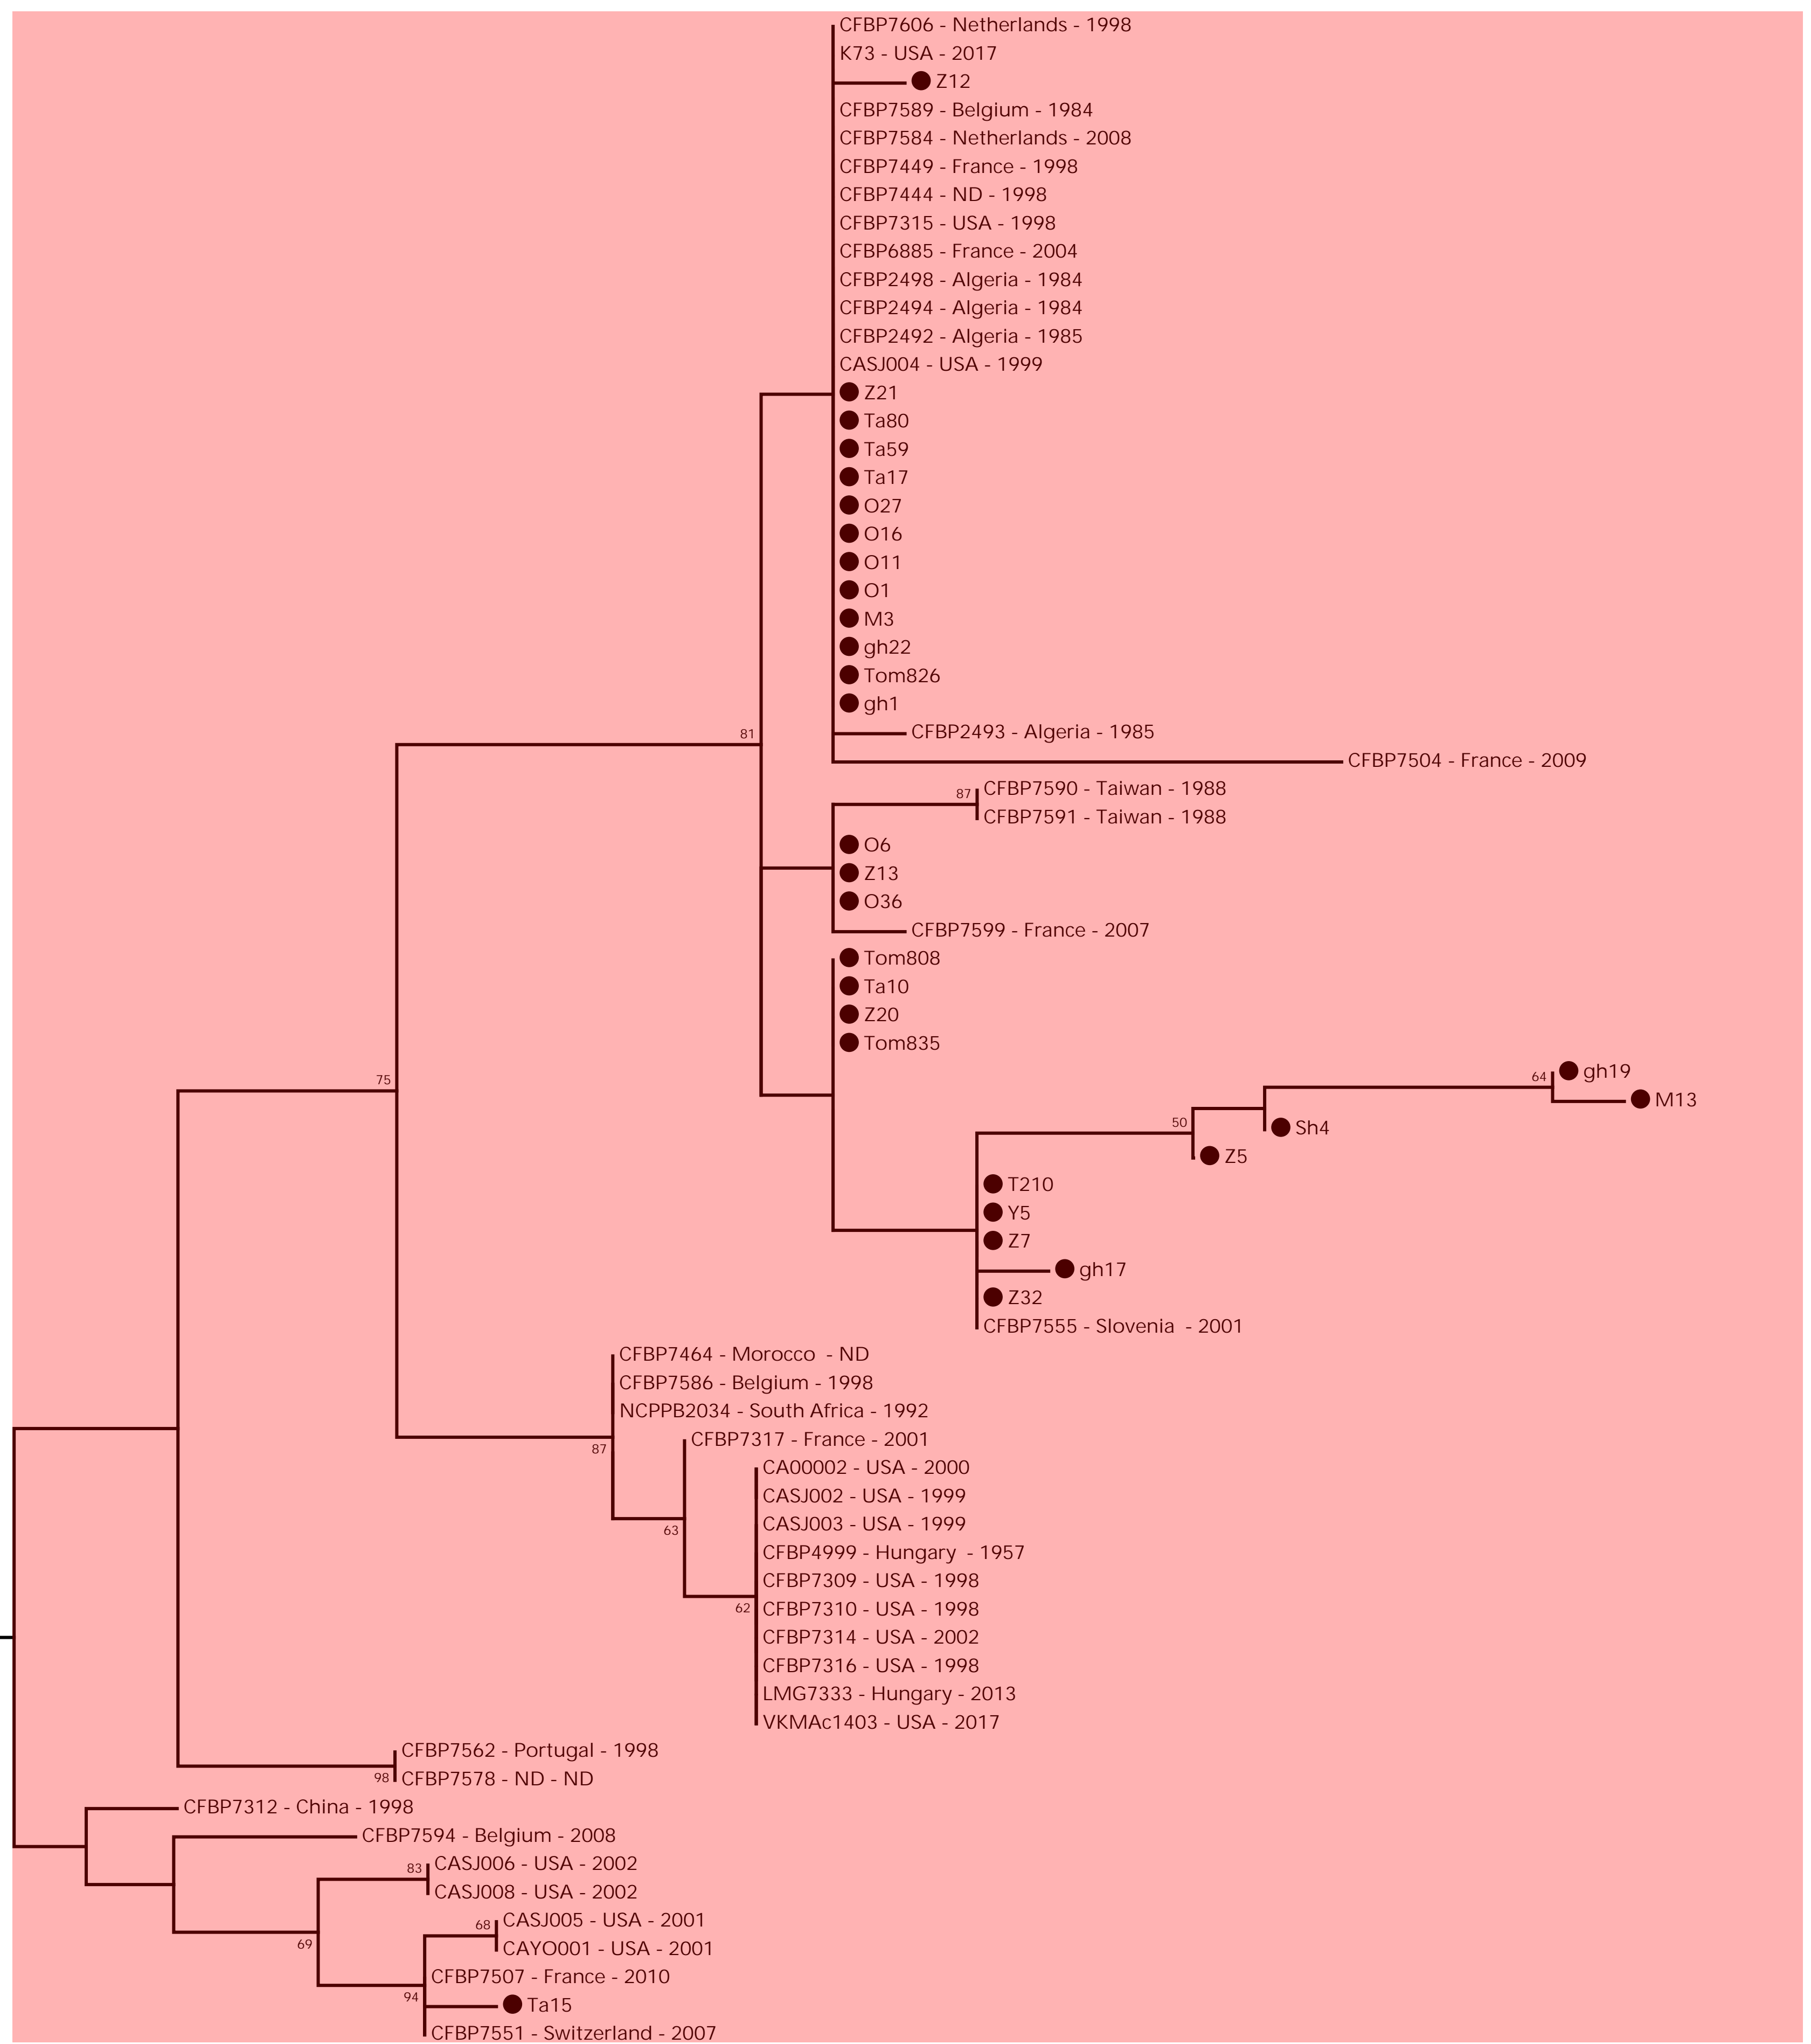

## Phylogroup II: Pre-1980s strains

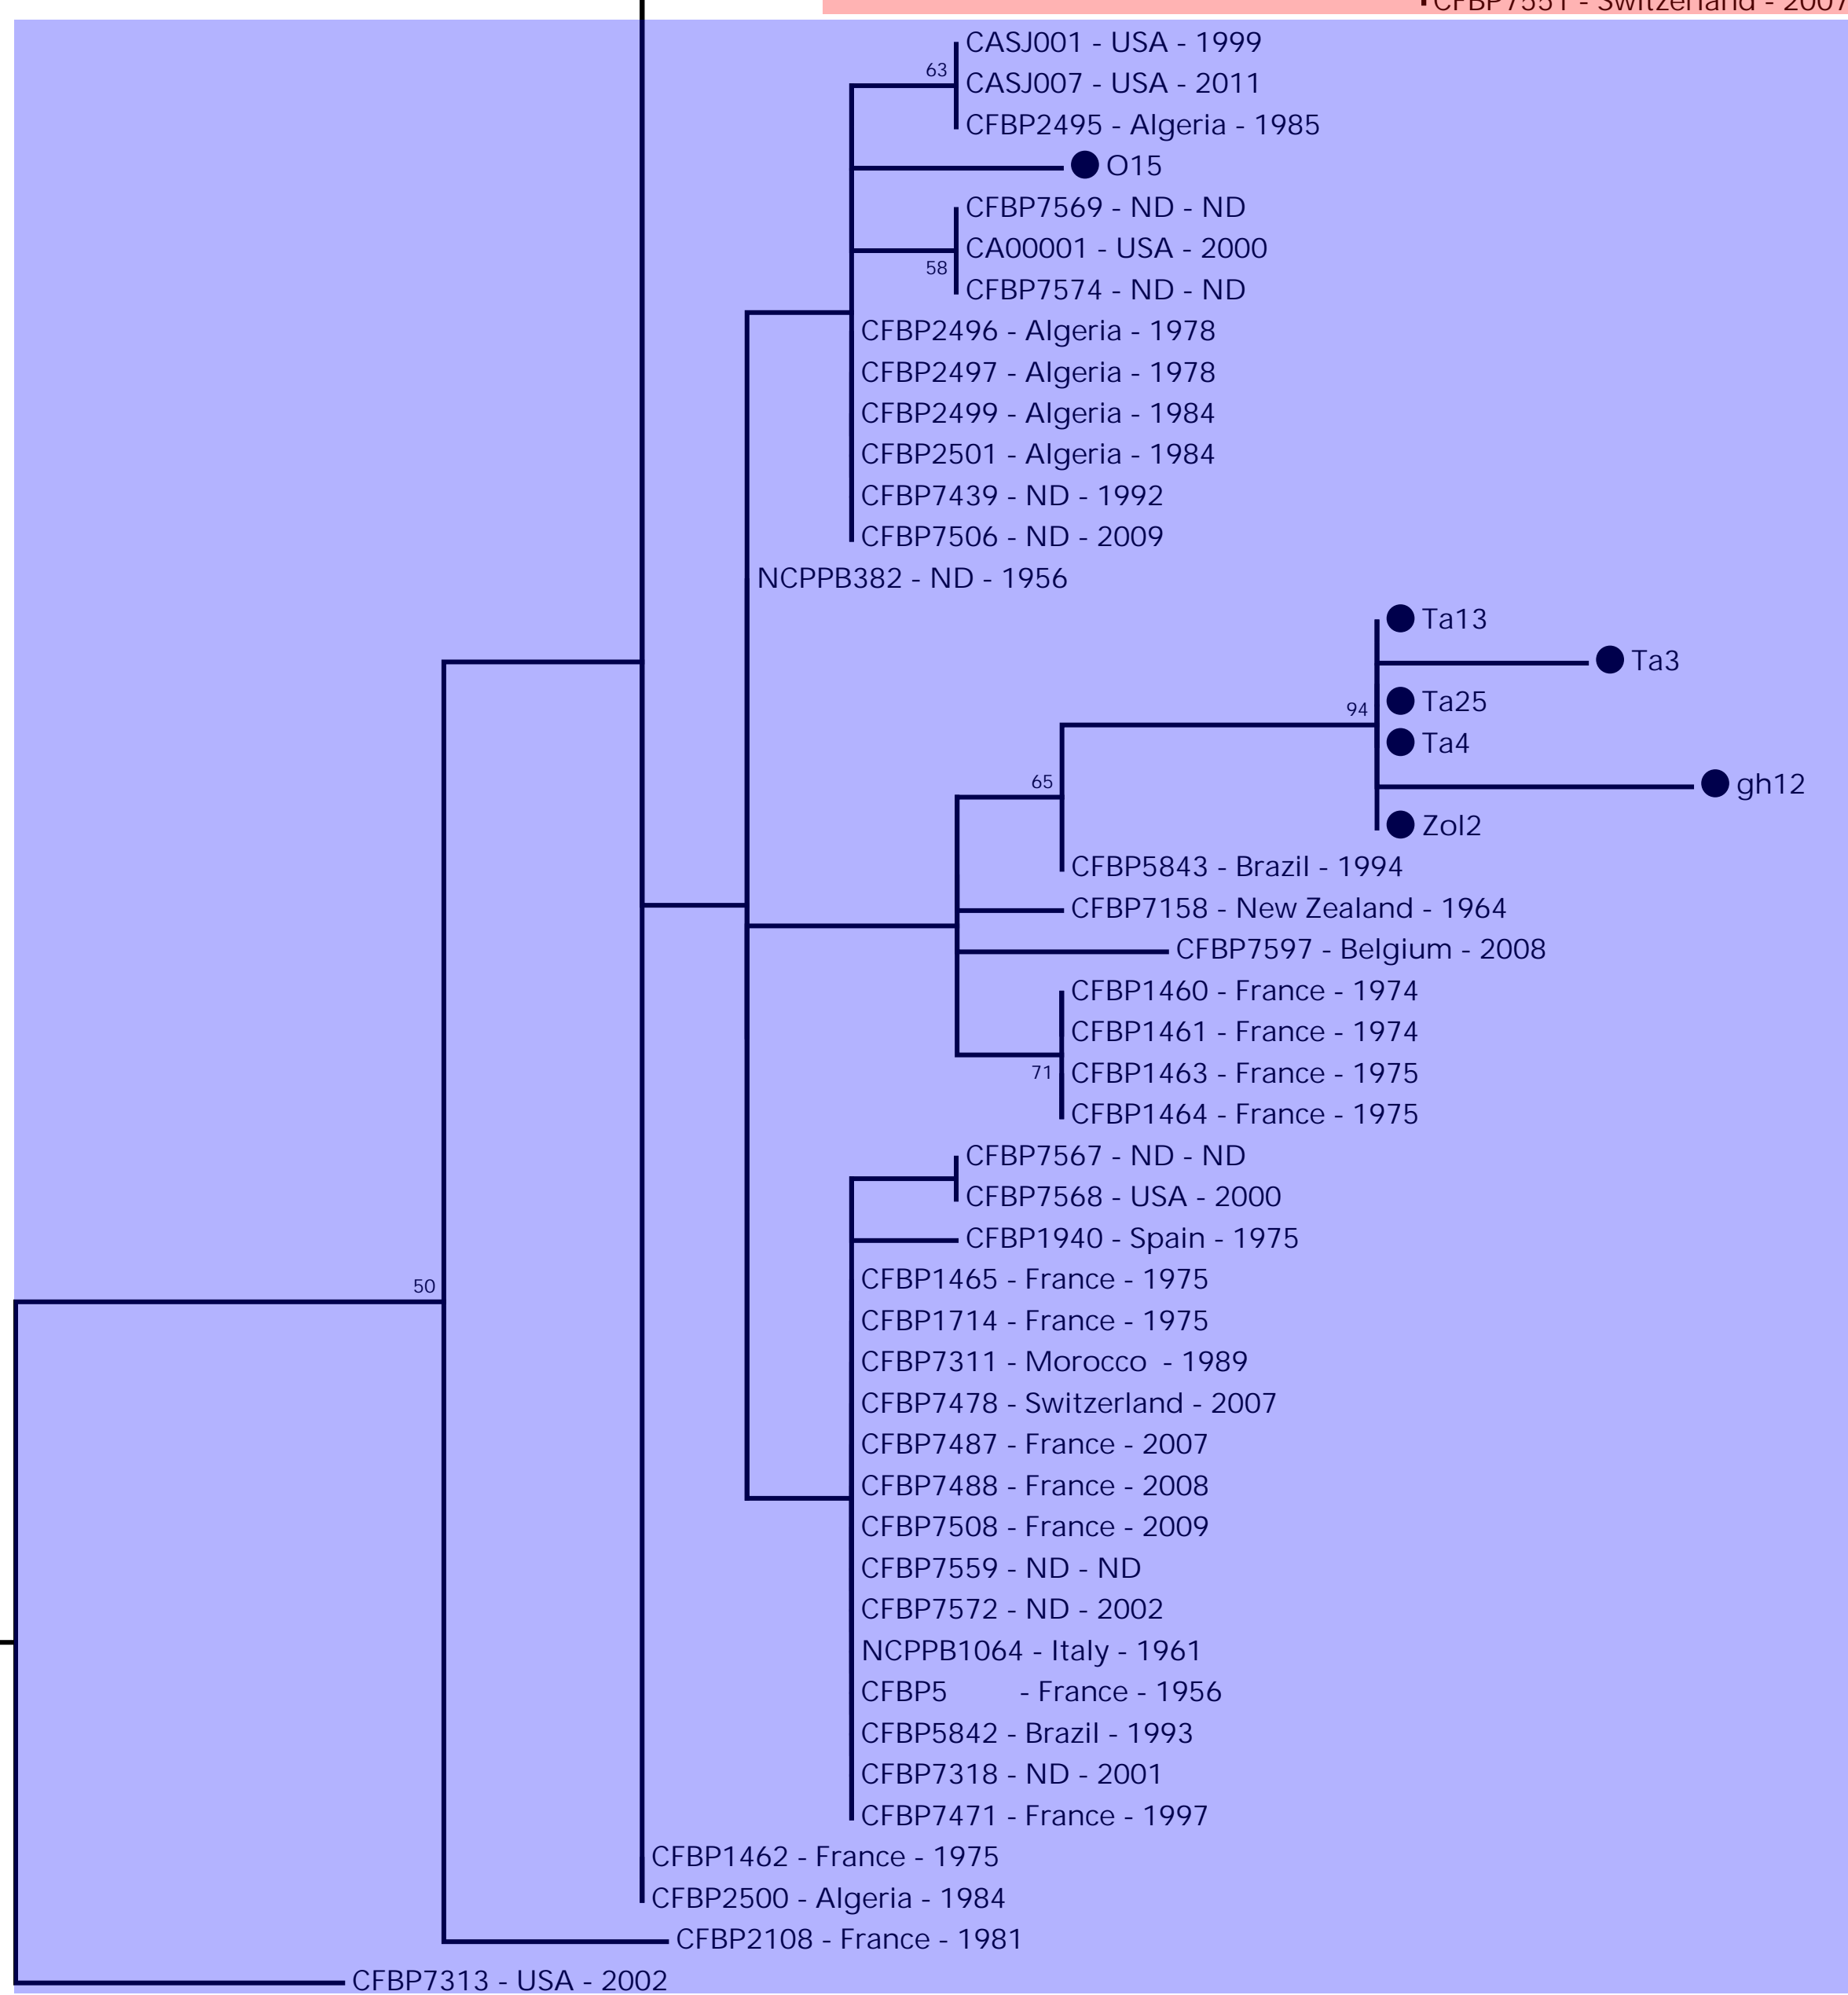

Figure S2: Maximum likelihood phylogenetic tree generated from the concatenated sequences of five housekeeping genes (i.e. *atpD*, *gyrB*, *ppk*, *recA*, and *rpoB*) in 120 worldwide *Clavibacter michiganensis* subsp. *michiganensis* strains. Black circles indicate the strains isolated in Iran. Red highlight indicates phylogroup I (post-1984), while blue highlight indicates phylogroup II (pre-1980s) strains of the pathogen.

*atpD*

VQ59  
CA00001  
● O6  
● O36  
● Z13  
CASJ001  
CASJ007  
CFBP1462  
CFBP1465  
CFBP1714  
CFBP1940  
CFBP2108  
CFBP2495  
CFBP2496  
CFBP2497  
CFBP2499  
CFBP2500  
CFBP2501  
CFBP5  
CFBP5842  
CFBP7311  
CFBP7312  
CFBP7318  
CFBP7439  
CFBP7471  
CFBP7478  
CFBP7487  
CFBP7488  
CFBP7506  
CFBP7508  
CFBP7559  
CFBP7562  
CFBP7567  
CFBP7568  
CFBP7569  
CFBP7572  
CFBP7574  
CFBP7578  
CFBP7590  
CFBP7591  
CFBP7599  
MAI1009  
MAI1020  
MAI1023  
MAI1024  
MAI1026  
MAI1028  
MAI1030  
MAI1033  
MAI1037  
NCPPB1064  
NCPPB382  
OP1  
OP3  
OP5  
OP7  
VL368  
VL431  
VL464  
VL478  
VL487  
VL493  
VL531  
VL533  
VLC31  
VLC78  
VO407  
VQ143  
VQ28  
VQ381  
VQ477  
VQ519

1

● O15  
CFBP2493 ] 2

● gh1  
● Tom826  
● gh19  
● gh22  
● M3  
● M13  
● O1  
● O11  
● O16  
● O27  
● Ta17  
● Ta59  
● Ta80  
● Z12  
● Z21  
CASJ004  
CFBP2492  
CFBP2494  
CFBP2498  
CFBP6885  
CFBP7315  
CFBP7444  
CFBP7449  
CFBP7504  
CFBP7584  
CFBP7589  
CFBP7606  
K73  
MAI1022  
VL527  
VL542  
VQ316

3

CASJ008  
CFBP7313  
CASJ006 ] 4

● Ta15  
CFBP7507  
CFBP7551 ] 5

CASJ005  
CAYO001  
MAI1002  
MAI1006  
MAI1007  
MAI1008  
MAI1017  
MAI1018  
MAI1019  
MAI1027  
MAI1032  
MAI1035 ] 6

● Tom808  
● Tom835  
● gh12  
● Ta3  
● Ta4  
● Ta10  
● Ta13  
● Ta25  
● Z20  
CFBP1460  
CFBP1461  
CFBP1463  
CFBP1464  
CFBP5843  
CFBP7158  
CFBP7594  
MAI1013  
MAI1016  
MAI1025  
MAI1029  
MAI1031  
MAI1034  
MAI1036  
MAI1038  
MAI1039  
MAI1040  
MSF322  
● Zol2

7

CFBP7464  
CFBP7586  
NCPPB2034 ] 8

● gh17  
● Sh4  
● Y5  
● Z5  
● Z7  
● Z32  
CA00002  
CASJ002  
CASJ003  
CFBP4999  
CFBP7309  
CFBP7310  
CFBP7314  
CFBP7316  
CFBP7317  
CFBP7555  
CFBP7597  
LMG7333  
MAI1001  
MAI1003  
MAI1004  
MAI1005  
MAI1010  
MAI1011  
MAI1012  
MAI1014  
MAI1015  
VKMAc1403  
● T210

9

C. michiganensis subsp. californiensis C55

Figure S3: Maximum likelihood phylogeny of *Clavibacter michiganensis* subsp. *michiganensis* strains using the sequences of five individual housekeeping genes (i.e. *atpD*, *gyrB*, *ppk*, *recA*, and *rpoB*). Allele's numbers (in the front of the strains) were assigned to the strains based on haplotype analyses in POPArt software as shown in Figure 4, and Table S1. Black circles indicate the strains isolated in Iran.

0.002

gyrB

VQ519  
 VQ59  
 VQ477  
 VQ381  
 VQ28  
 VQ143  
 VO407  
 VLC78  
 VLC31  
 VL533  
 VL531  
 VL493  
 VL487  
 VL478  
 VL464  
 VL431  
 VL368  
 OP7  
 OP5  
 OP3  
 OP1  
 MSF322  
 MAI1040  
 MAI1039  
 MAI1038  
 MAI1037  
 MAI1034  
 MAI1031  
 MAI1030  
 MAI1029  
 MAI1025  
 MAI1024  
 MAI1009  
 CFBP7591  
 CFBP7590  
 CFBP7578  
 CFBP7574  
 CFBP7569  
 CFBP7562  
 CFBP7551  
 CFBP7507  
 CFBP7313  
 CFBP5843  
 CAYO001  
 CASJ008  
 CASJ006  
 CASJ005  
 ● Ta25  
 ● Ta15  
 ● Ta13  
 ● Ta4  
 ● Ta3  
 ● Zol2  
 CA00001

58

1

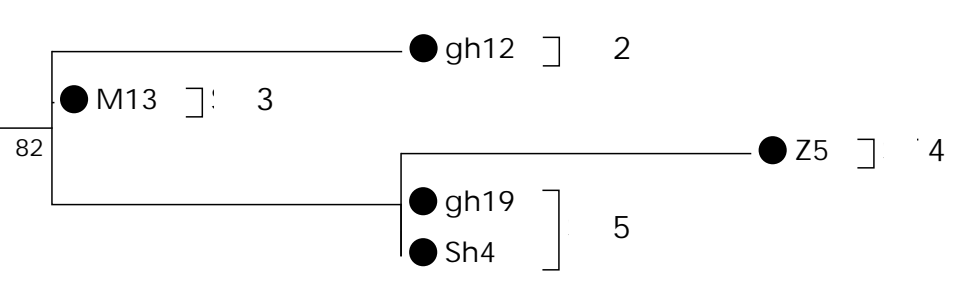

CFBP7567  
 CFBP7568  
 CFBP7572  
 CFBP7584  
 CFBP7586  
 CFBP7589  
 CFBP7597  
 CFBP7599  
 CFBP7606  
 K73  
 LMG7333  
 MAI1001  
 MAI1002  
 MAI1003  
 MAI1004  
 MAI1005  
 MAI1006  
 MAI1007  
 MAI1008  
 MAI1010  
 MAI1011  
 MAI1012  
 MAI1013  
 MAI1014  
 MAI1015  
 MAI1016  
 MAI1017  
 MAI1018  
 MAI1019  
 MAI1020  
 MAI1022  
 MAI1023  
 MAI1026  
 MAI1027  
 MAI1028  
 MAI1032  
 MAI1033  
 MAI1035  
 MAI1036  
 NCPPB1064  
 NCPPB2034  
 NCPPB382  
 VKMac1403  
 VL527  
 VL542  
 VQ316  
 ● gh1  
 ● Tom808  
 ● Tom826  
 ● Tom835  
 ● T210  
 ● gh17  
 ● gh22  
 ● M3  
 ● O1  
 ● O6  
 ● O11  
 ● O15  
 ● O16  
 ● O27  
 ● O36  
 ● Ta10  
 ● Ta17  
 ● Ta59  
 ● Ta80  
 ● Y5  
 ● Z7  
 ● Z12  
 ● Z13  
 ● Z20  
 ● Z21  
 ● Z32  
 CA00002  
 CASJ001  
 CASJ002  
 CASJ003  
 CASJ004  
 CASJ007  
 CFBP1460  
 CFBP1461  
 CFBP1462  
 CFBP1463  
 CFBP1464  
 CFBP1465  
 CFBP1714  
 CFBP1940  
 CFBP2108  
 CFBP2492  
 CFBP2493  
 CFBP2494  
 CFBP2495  
 CFBP2496  
 CFBP2497  
 CFBP2498  
 CFBP2499  
 CFBP2500  
 CFBP2501  
 CFBP4999  
 CFBP5  
 CFBP5842  
 CFBP6885  
 CFBP7158  
 CFBP7309  
 CFBP7310  
 CFBP7311  
 CFBP7312  
 CFBP7314  
 CFBP7315  
 CFBP7316  
 CFBP7317  
 CFBP7318  
 CFBP7439  
 CFBP7444  
 CFBP7449  
 CFBP7464  
 CFBP7471  
 CFBP7478  
 CFBP7487  
 CFBP7488  
 CFBP7504  
 CFBP7506

CFBP7594 ] 7

CFBP7508  
 CFBP7555  
 CFBP7559

6

CA00001  
 ● O15  
 CASJ001  
 CASJ007  
 CFBP1460  
 CFBP1461  
 CFBP1463  
 CFBP1464  
 CFBP2495  
 CFBP2496  
 CFBP2497  
 CFBP2499  
 CFBP2501  
 CFBP5843  
 CFBP7313  
 CFBP7439  
 CFBP7506  
 CFBP7569  
 CFBP7574  
 CFBP7597  
 MAI1009  
 MAI1024  
 MAI1025  
 MAI1026  
 MAI1029  
 MAI1030  
 MAI1031  
 MAI1033  
 MAI1034  
 MAI1037  
 MAI1038  
 MAI1039  
 MAI1040  
 MSF322  
 NCPPB382  
 OP1  
 OP3  
 OP5  
 OP7  
 VL368  
 VL431  
 VL464  
 VL478  
 VL487  
 VL493  
 VL531  
 VL533  
 VLC31  
 VLC78  
 VO407  
 VQ143  
 VQ28  
 VQ381  
 VQ519  
 VQ59  
 VQ477

1

● Zol2  
 ● gh12  
 ● Ta3  
 ● Ta4  
 ● Ta13  
 ● Ta25

96

2

CFBP2108  
 CFBP2500  
 CFBP1462

3

CASJ008  
 CFBP7594  
 CASJ006

4

● Ta15 ] 5

66

MAI1036  
 CASJ005  
 CAYO001  
 CFBP7312  
 CFBP7507  
 CFBP7551  
 MAI1002  
 MAI1006  
 MAI1007  
 MAI1008  
 MAI1013  
 MAI1016  
 MAI1017  
 MAI1018  
 MAI1019  
 MAI1027  
 MAI1032  
 MAI1035

6

CFBP1714  
 CFBP1940  
 CFBP5  
 CFBP5842  
 CFBP7158  
 CFBP7311  
 CFBP7318  
 CFBP7471  
 CFBP7478  
 CFBP7487  
 CFBP7488  
 CFBP7508  
 CFBP7559  
 CFBP7567  
 CFBP7568  
 CFBP7572  
 MAI1020  
 MAI1028  
 NCPPB1064  
 CFBP1465

61

7

CFBP7578  
 CFBP7562

88

LMG7333  
 VKMAc1403  
 CFBP7316  
 CFBP7314  
 CFBP7310  
 CFBP7309  
 CFBP4999  
 CASJ003  
 CASJ002  
 CA00002

62

9

NCPPB2034  
 CFBP7317  
 CFBP7464  
 CFBP7586

94

10

64

CFBP7504 ] 11

● gh1  
 ● Tom808  
 ● Tom826  
 ● gh17 ] 12  
 ● Tom835  
 ● Z12 ] 13  
 ● T210  
 CFBP7599 ] 14  
 ● gh19  
 ● gh22  
 ● M3  
 ● M13  
 ● O1  
 ● O6  
 ● O11  
 ● O16  
 ● O27  
 ● O36  
 ● Sh4  
 ● Ta10  
 ● Ta17  
 ● Ta59  
 ● Ta80  
 ● Y5  
 ● Z5  
 ● Z7  
 ● Z13  
 ● Z20  
 ● Z21  
 ● Z32

92

CASJ004  
 CFBP2492  
 CFBP2493  
 CFBP2494  
 CFBP2498  
 CFBP6885  
 CFBP7315  
 CFBP7444  
 CFBP7449  
 CFBP7555  
 CFBP7584  
 CFBP7589  
 CFBP7590  
 CFBP7591  
 CFBP7606  
 K73  
 MAI1001  
 MAI1003  
 MAI1004  
 MAI1005  
 MAI1010  
 MAI1011  
 MAI1012  
 MAI1014  
 MAI1015  
 MAI1022  
 MAI1023  
 VL527  
 VL542  
 VQ316

15

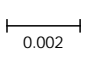

recA

CFBP7594  
 CFBP7597  
 CFBP7551  
 CFBP7507  
 CFBP7313  
 ● Ta25  
 ● Ta15  
 ● Ta13  
 ● Ta4  
 ● M13  
 ● Zol2  
 MAI1033  
 MAI1028  
 MAI1026  
 MAI1020  
 CFBP7586  
 CFBP7471  
 CFBP7464  
 CFBP7318  
 CFBP5842  
 CFBP5  
 CFBP1940  
 VQ316  
 VL542  
 VL527  
 VKMAc1403  
 NCPPB382  
 NCPPB2034  
 NCPPB1064  
 MSF322  
 MAI1040  
 MAI1039  
 MAI1038  
 MAI1037  
 MAI1036  
 MAI1034  
 MAI1031  
 MAI1030  
 MAI1029  
 MAI1025  
 MAI1024  
 MAI1023  
 MAI1022  
 MAI1016  
 MAI1015  
 MAI1014  
 MAI1013  
 MAI1012  
 MAI1011  
 MAI1010  
 MAI1009  
 MAI1005  
 MAI1004  
 MAI1003  
 MAI1001  
 LMG7333  
 K73  
 CFBP7606  
 CFBP7599  
 CFBP7589  
 CFBP7584  
 CFBP7572  
 CFBP7559  
 CFBP7555  
 CFBP7508  
 CFBP7504  
 CFBP7488  
 CFBP7487  
 CFBP7478  
 CFBP7449  
 CFBP7444  
 CFBP7317  
 CFBP7316  
 CFBP7315  
 CFBP7314  
 CFBP7311  
 CFBP7310  
 CFBP7309  
 CFBP7158  
 CFBP6885  
 CFBP5843  
 CFBP4999  
 CFBP2500  
 CFBP2498  
 CFBP2494  
 CFBP2493  
 CFBP2492  
 CFBP2108  
 CFBP1714  
 CFBP1465  
 CFBP1464  
 CFBP1463  
 CFBP1462  
 CFBP1461  
 CFBP1460  
 CAYO001  
 CASJ005  
 CASJ004  
 CASJ003  
 CASJ002  
 CA00002  
 ● Z32  
 ● Z21  
 ● Z20  
 ● Z13  
 ● Z12  
 ● Z7  
 ● Z5  
 ● Y5  
 ● Ta80  
 ● Ta59  
 ● Ta17  
 ● Ta10  
 ● Sh4  
 ● O36  
 ● O27  
 ● O16  
 ● O11  
 ● O6  
 ● O1  
 ● M3  
 ● gh22  
 ● gh19  
 ● gh17  
 ● gh12  
 ● T210  
 ● Tom835  
 ● Tom826  
 ● Tom808  
 ● gh1

1

2

3

61

CASJ006  
 CASJ008  
 CFBP7562  
 CFBP7578

4

CFBP2495  
 CFBP2496  
 CFBP2497  
 CFBP2499  
 CFBP2501  
 CFBP7312  
 CFBP7439  
 CFBP7506  
 CFBP7567  
 CFBP7568  
 CFBP7569  
 CFBP7574  
 CFBP7590  
 CFBP7591  
 OP1  
 OP3  
 OP5  
 OP7  
 VL368  
 VL431  
 VL464  
 VL478  
 VL487  
 VL493  
 VL531  
 VL533  
 VLC31  
 VLC78  
 VO407  
 VQ143  
 VQ28  
 VQ381  
 VQ477  
 VQ519  
 VQ59  
 CASJ001  
 CASJ007  
 CA00001

5

6

● O15  
 MAI1002  
 MAI1006  
 MAI1007  
 MAI1008  
 MAI1017  
 MAI1019  
 MAI1027  
 MAI1032  
 MAI1035

MAI1018

rpoB

CA00001  
 ● gh1  
 ● Zol2  
 ● Tom808  
 ● Tom826  
 ● Tom835  
 ● T210  
 ● gh12  
 ● gh17  
 ● gh19  
 ● gh22  
 ● M3  
 ● M13  
 ● O1  
 ● O6  
 ● O11  
 ● O15  
 ● O16  
 ● O27  
 ● O36  
 ● sh4

CFBP1460  
 CFBP1461  
 CFBP1463  
 CFBP1464  
 CFBP1940

62

2

● Ta3  
 ● Ta4  
 ● Ta10  
 ● Ta13  
 ● Ta15  
 ● Ta17  
 ● Ta25  
 ● Ta59  
 ● Ta80  
 ● Y5  
 ● Z5  
 ● Z7  
 ● Z12  
 ● Z13  
 ● Z20  
 ● Z21  
 ● Z32

CA00002  
 CASJ002  
 CASJ003  
 CASJ004  
 CASJ005  
 CASJ006  
 CASJ008  
 CAYO001

CFBP1462  
 CFBP1465  
 CFBP1714  
 CFBP2492  
 CFBP2493  
 CFBP2494  
 CFBP2496  
 CFBP2497  
 CFBP2498  
 CFBP2499  
 CFBP2500  
 CFBP2501  
 CFBP4999  
 CFBP5  
 CFBP5842  
 CFBP5843  
 CFBP6885  
 CFBP7158  
 CFBP7309  
 CFBP7310  
 CFBP7311  
 CFBP7312  
 CFBP7314  
 CFBP7315  
 CFBP7316  
 CFBP7317  
 CFBP7318  
 CFBP7439  
 CFBP7444  
 CFBP7449  
 CFBP7464  
 CFBP7471  
 CFBP7478  
 CFBP7487  
 CFBP7488

52

1

78

CFBP7504  
 CFBP7506  
 CFBP7507  
 CFBP7508  
 CFBP7551  
 CFBP7555  
 CFBP7559  
 CFBP7562  
 CFBP7567  
 CFBP7568  
 CFBP7569  
 CFBP7572  
 CFBP7574  
 CFBP7578  
 CFBP7584  
 CFBP7586  
 CFBP7589  
 CFBP7590  
 CFBP7591  
 CFBP7594  
 CFBP7597  
 CFBP7599  
 CFBP7606

72

K73  
 LMG7333  
 NCPPB1064  
 NCPPB2034  
 NCPPB382  
 VKMAc1403

CASJ001  
 CASJ007  
 CFBP2495

62

3

CFBP2108

4

CFBP7313 5

C. michiganensis subsp. californiensis C55

0.002

Figure S4: TCS sequence type (ST) network generated using POPArt program from the concatenated sequences of five housekeeping genes (i.e. *atpD*, *gyrB*, *ppk*, *recA* and *rpoB*) in 37 *Clavibacter michiganensis* subsp. *michiganensis* strains isolated in Iran. Each circle represents a ST while size of the circles indicates the relative frequency of the strains belonging to a particular ST (15 STs). Hatch marks along the branches indicate the number of mutations. Numbers in the left side of the radix character represent the corresponding ST as shown in Table 1, while the numbers in the right side of the radix character represent the number of strains in each ST. Each color indicate a different geographic location i.e. East Azerbaijan, Fars, Kohgiluyeh-Boyer-Ahmad, Qazvin, Razavi Khorasan, West Azerbaijan, and Zanzan provinces.

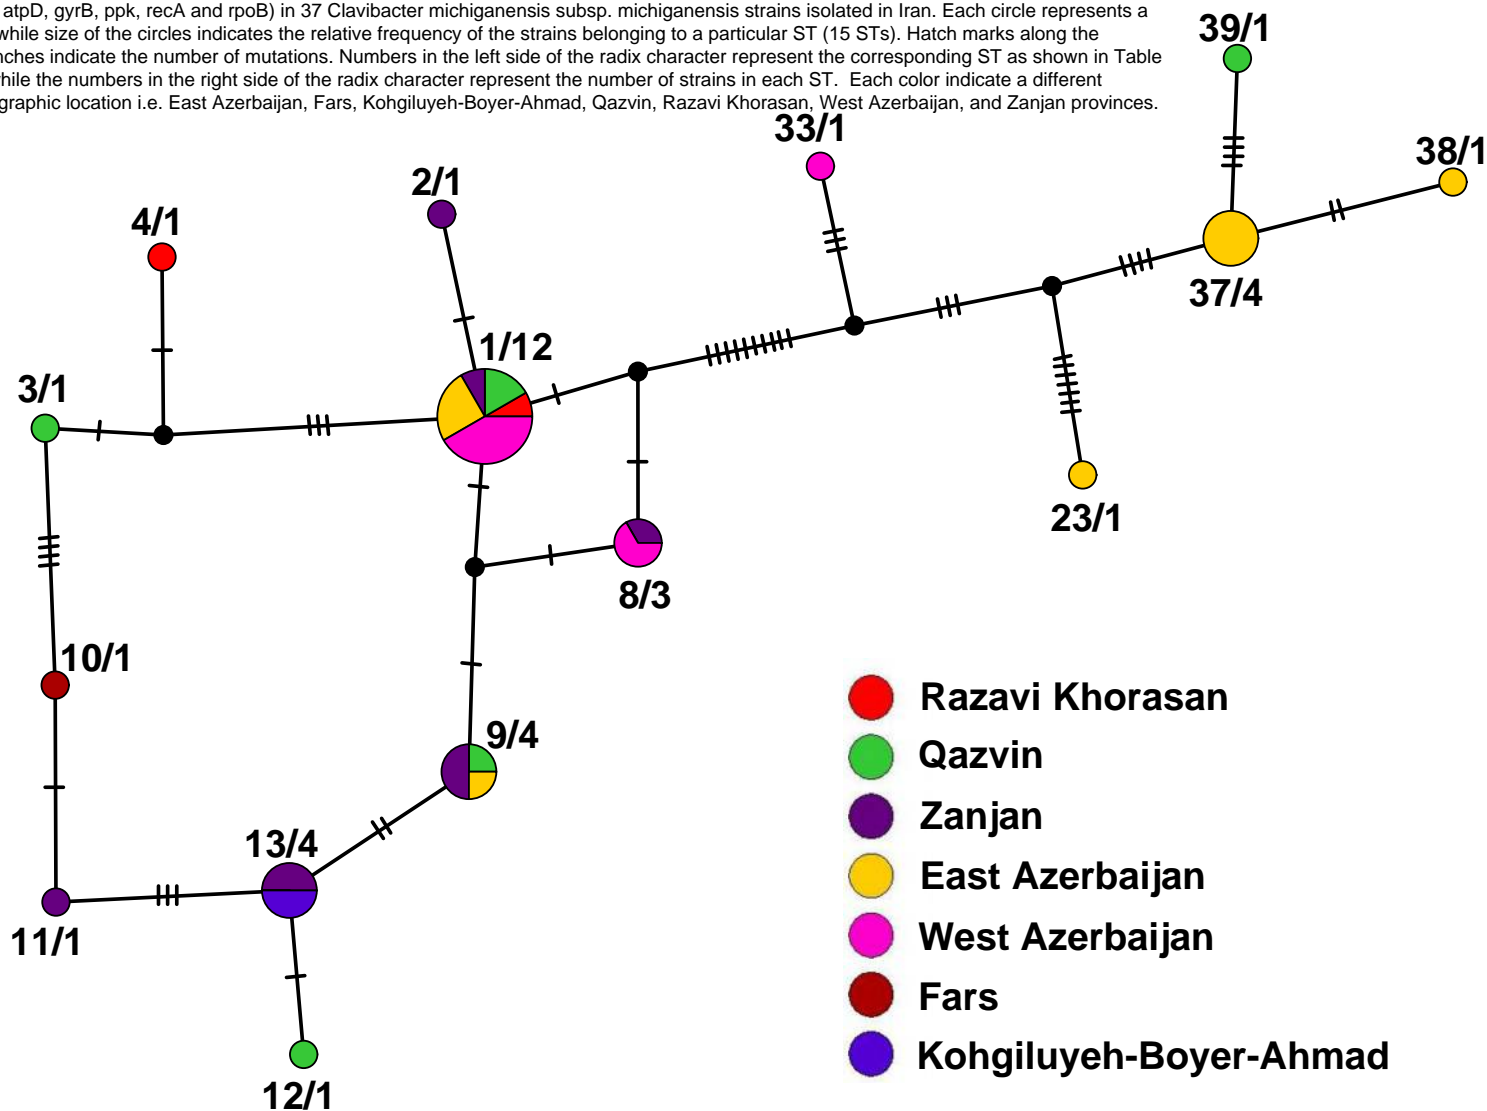



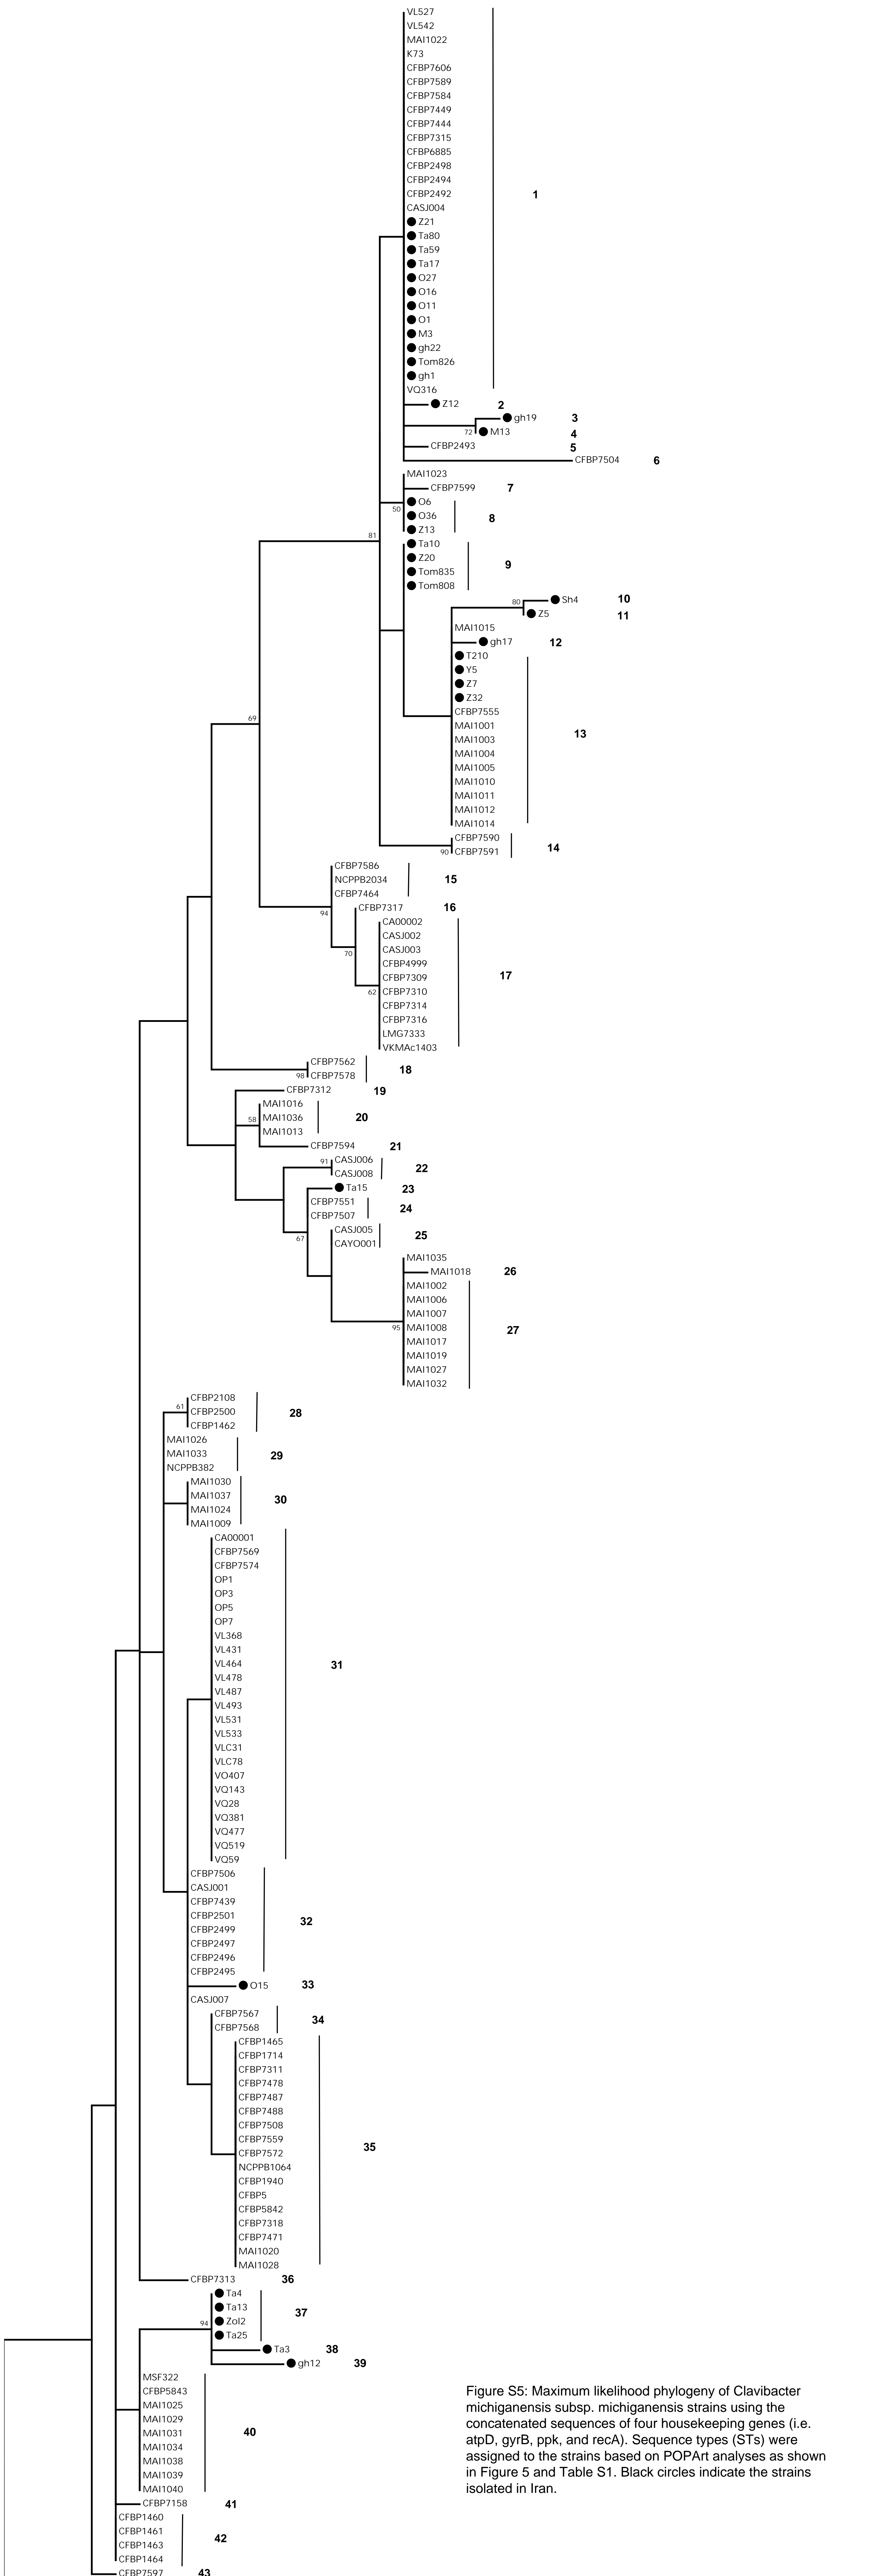

Figure S5: Maximum likelihood phylogeny of *Clavibacter michiganensis* subsp. *michiganensis* strains using the concatenated sequences of four housekeeping genes (i.e. *atpD*, *gyrB*, *ppk*, and *recA*). Sequence types (STs) were assigned to the strains based on POPArt analyses as shown in Figure 5 and Table S1. Black circles indicate the strains isolated in Iran.

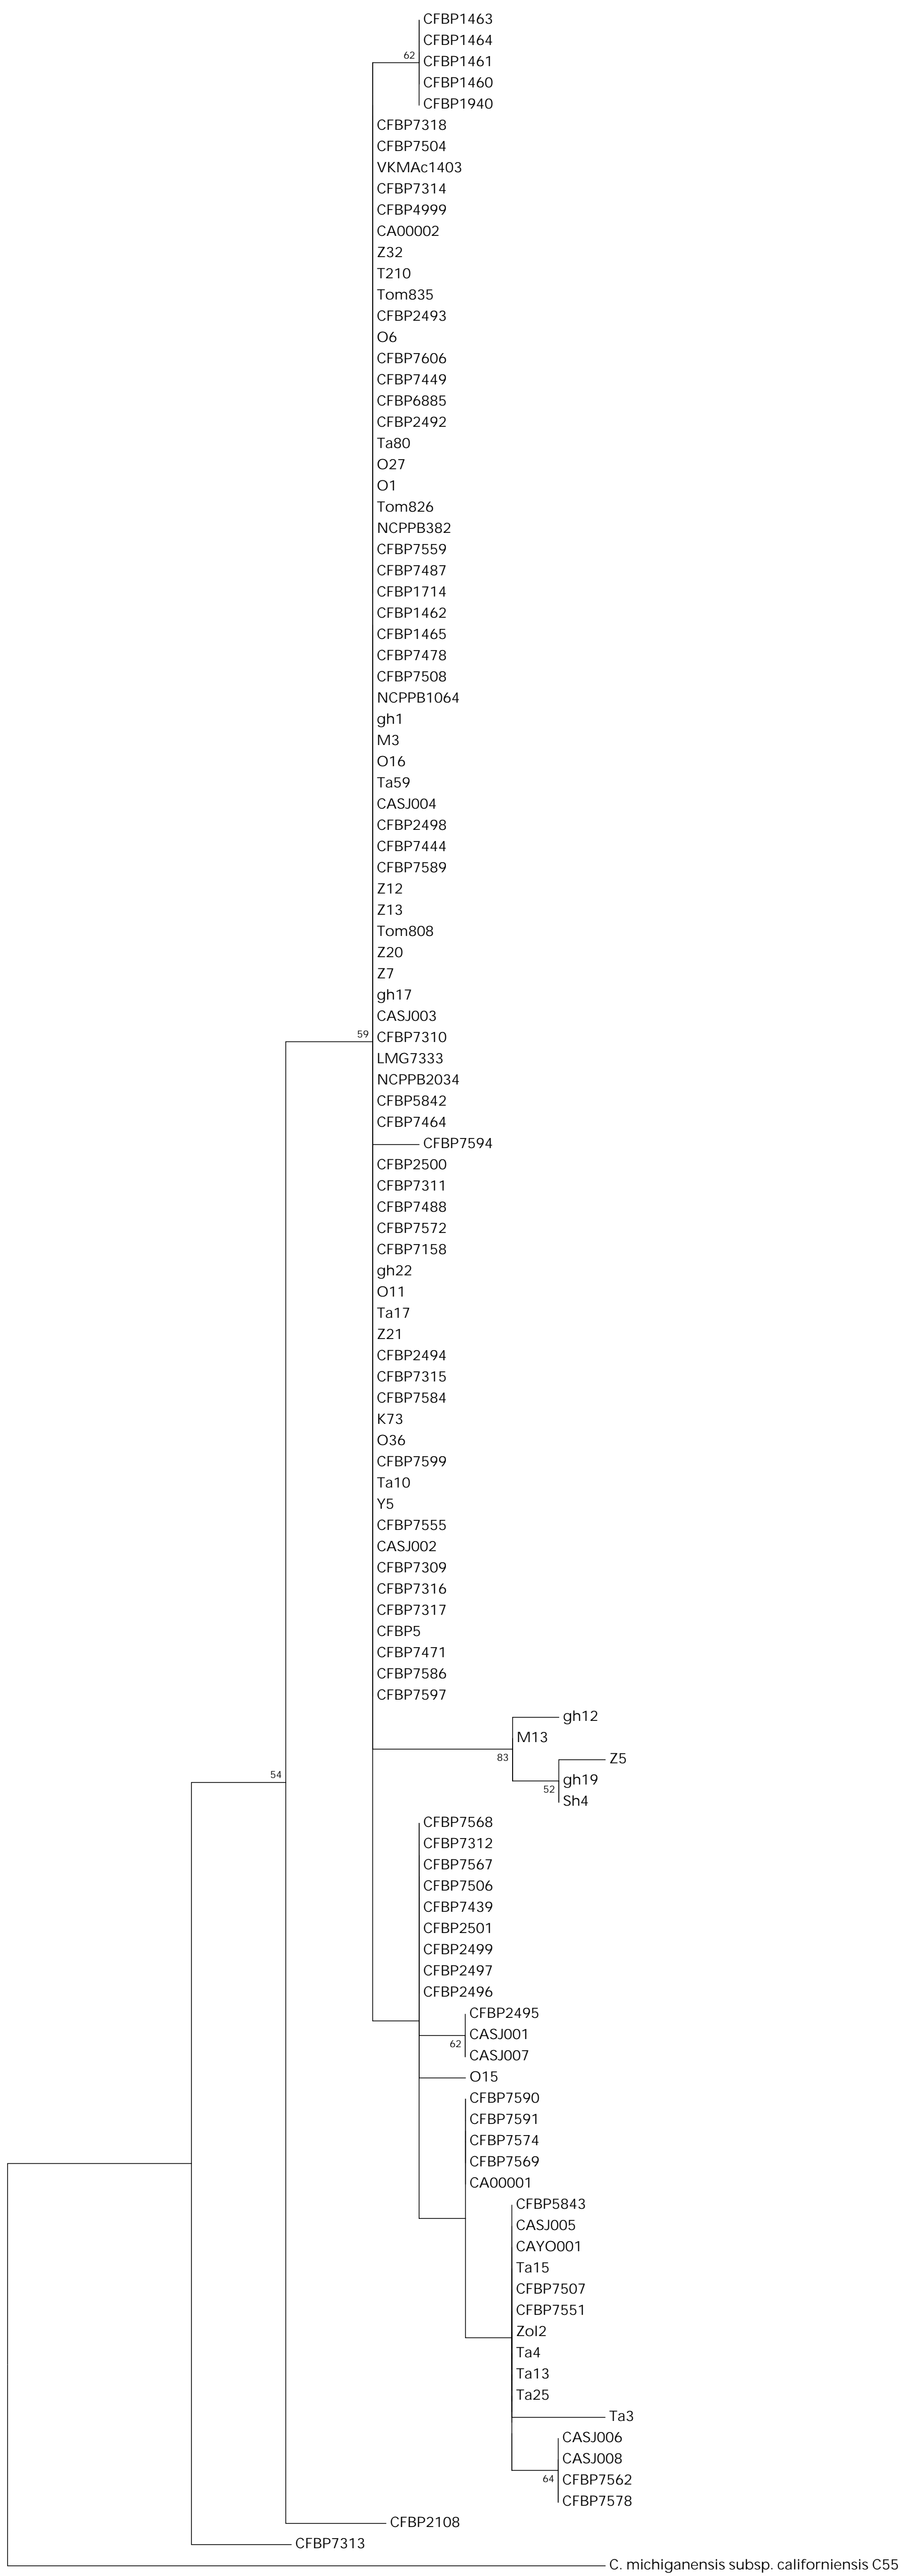

Figure S6: Maximum likelihood phylogeny of *Clavibacter michiganensis* subsp. *michiganensis* strains using the concatenated sequences of three recombination-free genes i.e. *gyrB*, *recA*, and *rpoB*. Results of three-gene phylogeny were in congruence with those obtained from the five-gene phylogeny, indicating that the worldwide Cmm strains clustered in a monophyletic clade apart from the remaining subspecies/species of *Clavibacter* spp.

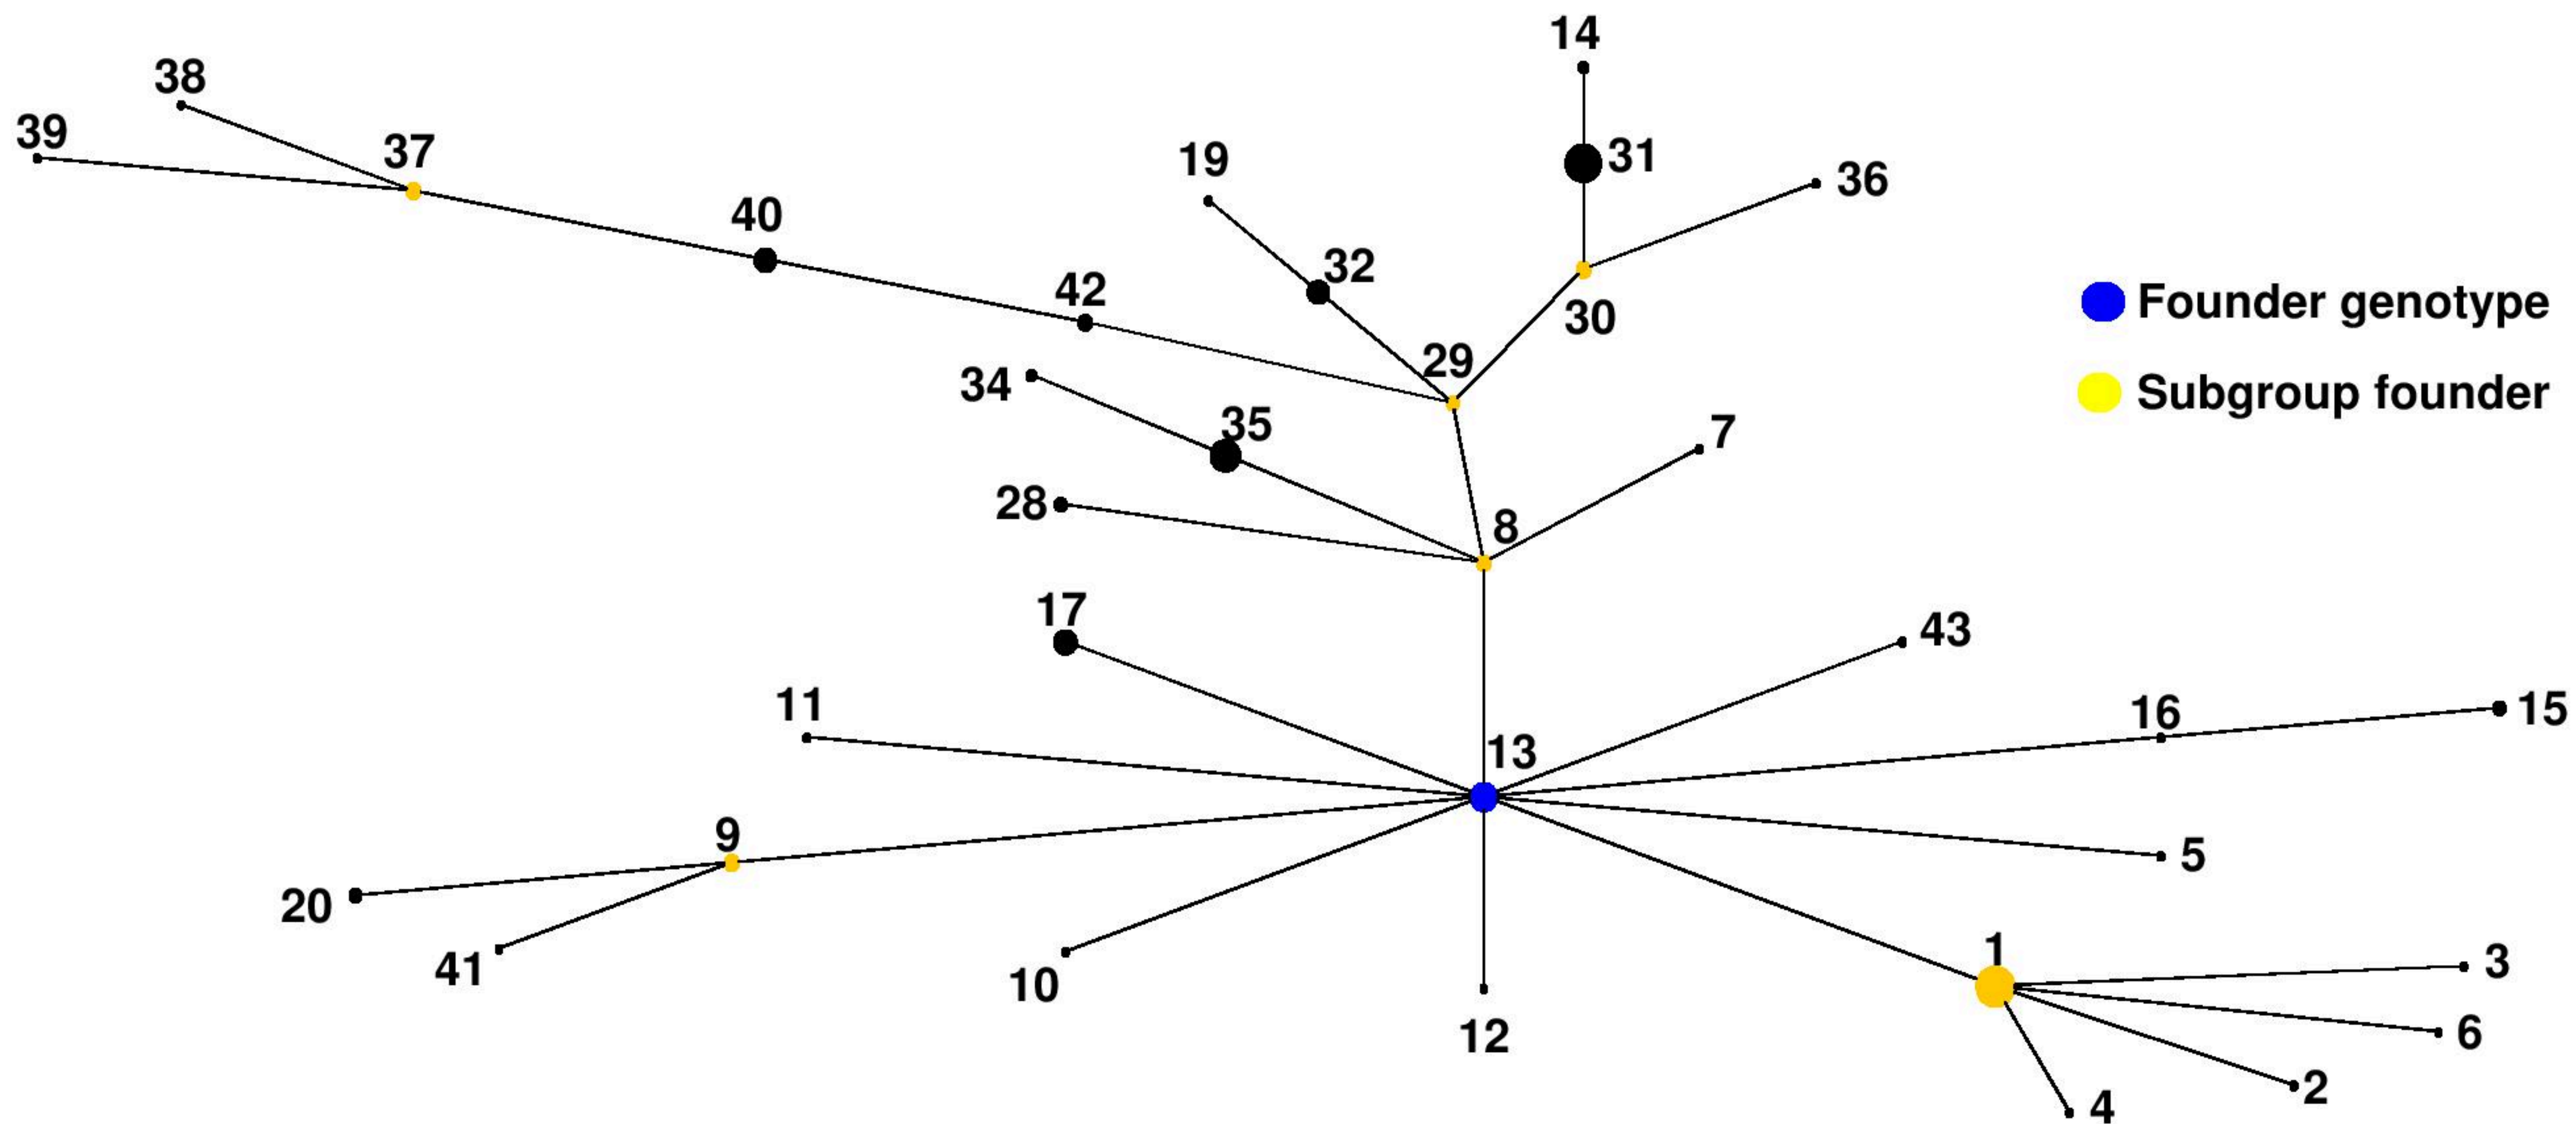

Figure S7: Analysis of worldwide *Clavibacter michiganensis* subsp. *michiganensis* strains using eBURST software with the stringent (default) group definition in which, strains are included within the same clonal complex only if they share identical alleles at three or four of the four MLST loci with at least one other alleles in the population. The predicted primary founder sequence type (ST13) is shown as a blue circle while the descendent subgroup founders are shown as yellow circles. Numbers in the eBURST diagram correspond to STs as shown in Table S1. Diameter of each circle corresponds to the abundance of the strains of a given ST in the input data.

**Table S1:** Worldwide strains of *Clavibacter michiganensis* subsp. *michiganensis* used in this study, their host, geographic area and date of isolation, as well as their allelic profile and sequence types based on the sequences of five housekeeping genes (*i.e.* *atpD*, *gyrB*, *ppk*, *recA*, and *rpoB*).

| Sequence type (ST) | Strain | Country | Year | Host   | Allelic profile |             |            |             |             |
|--------------------|--------|---------|------|--------|-----------------|-------------|------------|-------------|-------------|
|                    |        |         |      |        | <i>atpD</i>     | <i>gyrB</i> | <i>ppk</i> | <i>recA</i> | <i>rpoB</i> |
| 1                  | gh1    | Iran    | 2017 | Tomato | 3               | 6           | 15         | 1           | 1           |
| 39                 | gh12   | Iran    | 2017 | Tomato | 7               | 2           | 2          | 1           | 1           |
| 12                 | gh17   | Iran    | 2017 | Tomato | 9               | 6           | 12         | 1           | 1           |
| 3                  | gh19   | Iran    | 2017 | Tomato | 3               | 5           | 15         | 1           | 1           |
| 1                  | gh22   | Iran    | 2017 | Tomato | 3               | 6           | 15         | 1           | 1           |
| 4                  | M13    | Iran    | 2017 | Tomato | 3               | 3           | 15         | 1           | 1           |
| 1                  | M3     | Iran    | 2017 | Tomato | 3               | 6           | 15         | 1           | 1           |
| 1                  | O1     | Iran    | 2017 | Tomato | 3               | 6           | 15         | 1           | 1           |
| 1                  | O11    | Iran    | 2017 | Tomato | 3               | 6           | 15         | 1           | 1           |
| 33                 | O15    | Iran    | 2017 | Tomato | 2               | 6           | 1          | 5           | 1           |
| 1                  | O16    | Iran    | 2017 | Tomato | 3               | 6           | 15         | 1           | 1           |
| 1                  | O27    | Iran    | 2017 | Tomato | 3               | 6           | 15         | 1           | 1           |
| 8                  | O36    | Iran    | 2017 | Tomato | 1               | 6           | 15         | 1           | 1           |
| 8                  | O6     | Iran    | 2017 | Tomato | 1               | 6           | 15         | 1           | 1           |
| 10                 | Sh4    | Iran    | 2017 | Tomato | 9               | 5           | 15         | 1           | 1           |
| 13                 | T210   | Iran    | 2016 | Tomato | 9               | 6           | 15         | 1           | 1           |
| 9                  | Ta10   | Iran    | 2017 | Tomato | 7               | 6           | 15         | 1           | 1           |
| 37                 | Ta13   | Iran    | 2017 | Tomato | 7               | 1           | 2          | 1           | 1           |
| 23                 | Ta15   | Iran    | 2017 | Tomato | 5               | 1           | 5          | 1           | 1           |
| 1                  | Ta17   | Iran    | 2017 | Tomato | 3               | 6           | 15         | 1           | 1           |
| 37                 | Ta25   | Iran    | 2017 | Tomato | 7               | 1           | 2          | 1           | 1           |
| 38                 | Ta3    | Iran    | 2017 | Tomato | 7               | 1           | 2          | 2           | 1           |

|    |          |        |      |        |   |   |    |   |   |
|----|----------|--------|------|--------|---|---|----|---|---|
| 37 | Ta4      | Iran   | 2017 | Tomato | 7 | 1 | 2  | 1 | 1 |
| 1  | Ta59     | Iran   | 2017 | Tomato | 3 | 6 | 15 | 1 | 1 |
| 1  | Ta80     | Iran   | 2017 | Tomato | 3 | 6 | 15 | 1 | 1 |
| 9  | Tom808   | Iran   | 2015 | Tomato | 7 | 6 | 15 | 1 | 1 |
| 1  | Tom826   | Iran   | 2015 | Tomato | 3 | 6 | 15 | 1 | 1 |
| 9  | Tom835   | Iran   | 2015 | Tomato | 7 | 6 | 15 | 1 | 1 |
| 13 | Y5       | Iran   | 2017 | Tomato | 9 | 6 | 15 | 1 | 1 |
| 2  | Z12      | Iran   | 2017 | Tomato | 3 | 6 | 13 | 1 | 1 |
| 8  | Z13      | Iran   | 2017 | Tomato | 1 | 6 | 15 | 1 | 1 |
| 9  | Z20      | Iran   | 2017 | Tomato | 7 | 6 | 15 | 1 | 1 |
| 1  | Z21      | Iran   | 2017 | Tomato | 3 | 6 | 15 | 1 | 1 |
| 13 | Z32      | Iran   | 2017 | Tomato | 9 | 6 | 15 | 1 | 1 |
| 11 | Z5       | Iran   | 2017 | Tomato | 9 | 4 | 15 | 1 | 1 |
| 13 | Z7       | Iran   | 2017 | Tomato | 9 | 6 | 15 | 1 | 1 |
| 37 | Zol2     | Iran   | 2015 | Tomato | 7 | 1 | 2  | 1 | 1 |
| 31 | CA00001  | USA    | 2000 | Tomato | 1 | 1 | 1  | 4 | 1 |
| 17 | CA00002  | USA    | 2000 | Tomato | 9 | 6 | 9  | 1 | 1 |
| 32 | CASJ001  | USA    | 1999 | Tomato | 1 | 6 | 1  | 4 | 3 |
| 17 | CASJ002  | USA    | 1999 | Tomato | 9 | 6 | 9  | 1 | 1 |
| 17 | CASJ003  | USA    | 1999 | Tomato | 9 | 6 | 9  | 1 | 1 |
| 1  | CASJ004  | USA    | 1999 | Tomato | 3 | 6 | 15 | 1 | 1 |
| 25 | CASJ005  | USA    | 2001 | Tomato | 6 | 1 | 6  | 1 | 1 |
| 22 | CASJ006  | USA    | 2002 | Tomato | 4 | 1 | 4  | 3 | 1 |
| 32 | CASJ007  | USA    | 2011 | Tomato | 1 | 6 | 1  | 4 | 3 |
| 22 | CASJ008  | USA    | 2002 | Tomato | 4 | 1 | 4  | 3 | 1 |
| 25 | CAYO001  | USA    | 2001 | Tomato | 6 | 1 | 6  | 1 | 1 |
| 42 | CFBP1460 | France | 1974 | Tomato | 7 | 6 | 1  | 1 | 2 |
| 42 | CFBP1461 | France | 1974 | Tomato | 7 | 6 | 1  | 1 | 2 |
| 28 | CFBP1462 | France | 1975 | Tomato | 1 | 6 | 3  | 1 | 1 |
| 42 | CFBP1463 | France | 1975 | Tomato | 7 | 6 | 1  | 1 | 2 |
| 42 | CFBP1464 | France | 1975 | Tomato | 7 | 6 | 1  | 1 | 2 |

|    |          |             |      |                     |   |   |    |   |   |
|----|----------|-------------|------|---------------------|---|---|----|---|---|
| 35 | CFBP1465 | France      | 1975 | Tomato              | 1 | 6 | 7  | 1 | 1 |
| 35 | CFBP1714 | France      | 1975 | Tomato              | 1 | 6 | 7  | 1 | 1 |
| 35 | CFBP1940 | Spain       | 1975 | Tomato              | 1 | 6 | 7  | 1 | 2 |
| 28 | CFBP2108 | France      | 1981 | Tomato              | 1 | 6 | 3  | 1 | 4 |
| 1  | CFBP2492 | Algeria     | 1985 | Tomato              | 3 | 6 | 15 | 1 | 1 |
| 5  | CFBP2493 | Algeria     | 1985 | Tomato              | 2 | 6 | 15 | 1 | 1 |
| 1  | CFBP2494 | Algeria     | 1984 | Tomato              | 3 | 6 | 15 | 1 | 1 |
| 32 | CFBP2495 | Algeria     | 1985 | Tomato              | 1 | 6 | 1  | 4 | 3 |
| 32 | CFBP2496 | Algeria     | 1978 | Tomato              | 1 | 6 | 1  | 4 | 1 |
| 32 | CFBP2497 | Algeria     | 1978 | Tomato              | 1 | 6 | 1  | 4 | 1 |
| 1  | CFBP2498 | Algeria     | 1984 | Tomato              | 3 | 6 | 15 | 1 | 1 |
| 32 | CFBP2499 | Algeria     | 1984 | Black<br>nightshade | 1 | 6 | 1  | 4 | 1 |
| 28 | CFBP2500 | Algeria     | 1984 | Black<br>nightshade | 1 | 6 | 3  | 1 | 1 |
| 32 | CFBP2501 | Algeria     | 1984 | Peppers             | 1 | 6 | 1  | 4 | 1 |
| 17 | CFBP4999 | Hungary     | 1957 | Tomato              | 9 | 6 | 9  | 1 | 1 |
| 35 | CFBP5    | France      | 1956 | Tomato              | 1 | 6 | 7  | 1 | 1 |
| 35 | CFBP5842 | Brazil      | 1993 | Peppers             | 1 | 6 | 7  | 1 | 1 |
| 40 | CFBP5843 | Brazil      | 1994 | Tomato              | 7 | 1 | 1  | 1 | 1 |
| 1  | CFBP6885 | France      | 2004 | Tomato              | 3 | 6 | 15 | 1 | 1 |
| 41 | CFBP7158 | New Zealand | 1964 | Tomato              | 7 | 6 | 7  | 1 | 1 |
| 17 | CFBP7309 | USA         | 1998 | Tomato              | 9 | 6 | 9  | 1 | 1 |
| 17 | CFBP7310 | USA         | 1998 | Tomato              | 9 | 6 | 9  | 1 | 1 |
| 35 | CFBP7311 | Morocco     | 1989 | Tomato              | 1 | 6 | 7  | 1 | 1 |
| 19 | CFBP7312 | China       | 1998 | Tomato              | 1 | 6 | 6  | 4 | 1 |
| 36 | CFBP7313 | USA         | 2002 | Tomato              | 4 | 1 | 1  | 1 | 5 |
| 17 | CFBP7314 | USA         | 2002 | Tomato              | 9 | 6 | 9  | 1 | 1 |
| 1  | CFBP7315 | USA         | 1998 | Tomato              | 3 | 6 | 15 | 1 | 1 |
| 17 | CFBP7316 | USA         | 1998 | Tomato              | 9 | 6 | 9  | 1 | 1 |
| 16 | CFBP7317 | France      | 2001 | ND                  | 9 | 6 | 10 | 1 | 1 |

|    |          |                 |      |        |   |   |    |   |   |
|----|----------|-----------------|------|--------|---|---|----|---|---|
| 35 | CFBP7318 | ND              | 2001 | ND     | 1 | 6 | 7  | 1 | 1 |
| 32 | CFBP7439 | ND              | 1992 | ND     | 1 | 6 | 1  | 4 | 1 |
| 1  | CFBP7444 | ND              | 1998 | Tomato | 3 | 6 | 15 | 1 | 1 |
| 1  | CFBP7449 | France          | 1998 | Tomato | 3 | 6 | 15 | 1 | 1 |
| 15 | CFBP7464 | Morocco         | ND   | Tomato | 8 | 6 | 10 | 1 | 1 |
| 35 | CFBP7471 | France          | 1997 | Tomato | 1 | 6 | 7  | 1 | 1 |
| 35 | CFBP7478 | Switzerland     | 2007 | Tomato | 1 | 6 | 7  | 1 | 1 |
| 35 | CFBP7487 | France          | 2007 | Tomato | 1 | 6 | 7  | 1 | 1 |
| 35 | CFBP7488 | France          | 2008 | Tomato | 1 | 6 | 7  | 1 | 1 |
| 6  | CFBP7504 | France          | 2009 | Tomato | 3 | 6 | 11 | 1 | 1 |
| 32 | CFBP7506 | ND              | 2009 | ND     | 1 | 6 | 1  | 4 | 1 |
| 24 | CFBP7507 | France          | 2010 | Tomato | 5 | 1 | 6  | 1 | 1 |
| 35 | CFBP7508 | France          | 2009 | Tomato | 1 | 6 | 7  | 1 | 1 |
| 24 | CFBP7551 | Switzerland     | 2007 | Tomato | 5 | 1 | 6  | 1 | 1 |
| 13 | CFBP7555 | Slovenia        | 2001 | Tomato | 9 | 6 | 15 | 1 | 1 |
| 35 | CFBP7559 | ND              | ND   | ND     | 1 | 6 | 7  | 1 | 1 |
| 18 | CFBP7562 | Portugal        | 1998 | Tomato | 1 | 1 | 8  | 3 | 1 |
| 34 | CFBP7567 | ND              | ND   | Tomato | 1 | 6 | 7  | 4 | 1 |
| 34 | CFBP7568 | USA             | 2000 | Tomato | 1 | 6 | 7  | 4 | 1 |
| 31 | CFBP7569 | ND              | ND   | Tomato | 1 | 1 | 1  | 4 | 1 |
| 35 | CFBP7572 | ND              | 2002 | Tomato | 1 | 6 | 7  | 1 | 1 |
| 31 | CFBP7574 | ND              | ND   | Tomato | 1 | 1 | 1  | 4 | 1 |
| 18 | CFBP7578 | ND              | ND   | Tomato | 1 | 1 | 8  | 3 | 1 |
| 1  | CFBP7584 | The Netherlands | 2008 | Tomato | 3 | 6 | 15 | 1 | 1 |
| 15 | CFBP7586 | Belgium         | 1998 | Tomato | 8 | 6 | 10 | 1 | 1 |
| 1  | CFBP7589 | Belgium         | 1984 | Tomato | 3 | 6 | 15 | 1 | 1 |
| 14 | CFBP7590 | Taiwan          | 1988 | Tomato | 1 | 1 | 15 | 4 | 1 |
| 14 | CFBP7591 | Taiwan          | 1988 | Tomato | 1 | 1 | 15 | 4 | 1 |
| 21 | CFBP7594 | Belgium         | 2008 | Tomato | 7 | 7 | 4  | 1 | 1 |
| 43 | CFBP7597 | Belgium         | 2008 | Tomato | 9 | 6 | 1  | 1 | 1 |
| 7  | CFBP7599 | France          | 2007 | Tomato | 1 | 6 | 14 | 1 | 1 |

|    |          |                 |      |        |   |   |    |   |    |
|----|----------|-----------------|------|--------|---|---|----|---|----|
| 1  | CFBP7606 | The Netherlands | 1998 | Tomato | 3 | 6 | 15 | 1 | 1  |
| 1  | K73      | USA             | 2017 | Tomato | 3 | 6 | 15 | 1 | 1  |
| 17 | LMG7333  | Hungary         | 1956 | Tomato | 9 | 6 | 9  | 1 | 1  |
| 13 | MAI1001  | Uruguay         | 2012 | Tomato | 9 | 6 | 15 | 1 | ND |
| 27 | MAI1002  | Uruguay         | 2012 | Tomato | 6 | 6 | 6  | 5 | ND |
| 13 | MAI1003  | Uruguay         | 2012 | Tomato | 9 | 6 | 15 | 1 | ND |
| 13 | MAI1004  | Uruguay         | 2012 | Tomato | 9 | 6 | 15 | 1 | ND |
| 13 | MAI1005  | Uruguay         | 2012 | Tomato | 9 | 6 | 15 | 1 | ND |
| 27 | MAI1006  | Uruguay         | 2012 | Tomato | 6 | 6 | 6  | 5 | ND |
| 27 | MAI1007  | Uruguay         | 2012 | Tomato | 6 | 6 | 6  | 5 | ND |
| 27 | MAI1008  | Uruguay         | 2012 | Tomato | 6 | 6 | 6  | 5 | ND |
| 30 | MAI1009  | Uruguay         | 2012 | Tomato | 1 | 1 | 1  | 1 | ND |
| 13 | MAI1010  | Uruguay         | 2012 | Tomato | 9 | 6 | 15 | 1 | ND |
| 13 | MAI1011  | Uruguay         | 2012 | Tomato | 9 | 6 | 15 | 1 | ND |
| 13 | MAI1012  | Uruguay         | 2012 | Tomato | 9 | 6 | 15 | 1 | ND |
| 20 | MAI1013  | Uruguay         | 2012 | Tomato | 7 | 6 | 6  | 1 | ND |
| 13 | MAI1014  | Uruguay         | 2012 | Tomato | 9 | 6 | 15 | 1 | ND |
| 13 | MAI1015  | Uruguay         | 2012 | Tomato | 9 | 6 | 15 | 1 | ND |
| 20 | MAI1016  | Uruguay         | 2012 | Tomato | 7 | 6 | 6  | 1 | ND |
| 27 | MAI1017  | Uruguay         | 2012 | Tomato | 6 | 6 | 6  | 5 | ND |
| 26 | MAI1018  | Uruguay         | 2012 | Tomato | 6 | 6 | 6  | 6 | ND |
| 27 | MAI1019  | Uruguay         | 2012 | Tomato | 6 | 6 | 6  | 5 | ND |
| 35 | MAI1020  | Uruguay         | 2012 | Tomato | 1 | 6 | 7  | 1 | ND |
| 1  | MAI1022  | Uruguay         | 1997 | Tomato | 3 | 6 | 15 | 1 | ND |
| 8  | MAI1023  | Uruguay         | 1997 | Tomato | 1 | 6 | 15 | 1 | ND |
| 30 | MAI1024  | Uruguay         | 1997 | Tomato | 1 | 1 | 1  | 1 | ND |
| 40 | MAI1025  | Uruguay         | 2005 | Tomato | 7 | 1 | 1  | 1 | ND |
| 29 | MAI1026  | Uruguay         | 1999 | Tomato | 1 | 6 | 1  | 1 | ND |
| 27 | MAI1027  | Uruguay         | 2008 | Tomato | 6 | 6 | 6  | 5 | ND |
| 35 | MAI1028  | Uruguay         | 2011 | Tomato | 1 | 6 | 7  | 1 | ND |
| 40 | MAI1029  | Uruguay         | 2011 | Tomato | 7 | 1 | 1  | 1 | ND |



|    |           |              |      |        |   |   |    |   |    |
|----|-----------|--------------|------|--------|---|---|----|---|----|
| 30 | MAI1030   | Uruguay      | 2010 | Tomato | 1 | 1 | 1  | 1 | ND |
| 40 | MAI1031   | Uruguay      | 2010 | Tomato | 7 | 1 | 1  | 1 | ND |
| 27 | MAI1032   | Uruguay      | 2010 | Tomato | 6 | 6 | 6  | 5 | ND |
| 29 | MAI1033   | Uruguay      | 2010 | Tomato | 1 | 6 | 1  | 1 | ND |
| 40 | MAI1034   | Uruguay      | 2010 | Tomato | 7 | 1 | 1  | 1 | ND |
| 27 | MAI1035   | Uruguay      | 2010 | Tomato | 6 | 6 | 6  | 5 | ND |
| 20 | MAI1036   | Uruguay      | 2010 | Tomato | 7 | 6 | 6  | 1 | ND |
| 30 | MAI1037   | Uruguay      | 2010 | Tomato | 1 | 1 | 1  | 1 | ND |
| 40 | MAI1038   | Uruguay      | 2010 | Tomato | 7 | 1 | 1  | 1 | ND |
| 40 | MAI1039   | Uruguay      | 2010 | Tomato | 7 | 1 | 1  | 1 | ND |
| 40 | MAI1040   | Uruguay      | 2010 | Tomato | 7 | 1 | 1  | 1 | ND |
| 40 | MSF322    | Uruguay      | 2005 | Tomato | 7 | 1 | 1  | 1 | ND |
| 35 | NCPPB1064 | Italy        | 1961 | Tomato | 1 | 6 | 7  | 1 | 1  |
| 15 | NCPPB2034 | South Africa | 1992 | Tomato | 8 | 6 | 10 | 1 | 1  |
| 29 | NCPPB382  | ND           | 1956 | Tomato | 1 | 6 | 1  | 1 | 1  |
| 31 | OP1       | Chile        | 2015 | Tomato | 1 | 1 | 1  | 4 | ND |
| 31 | OP3       | Chile        | 2015 | Tomato | 1 | 1 | 1  | 4 | ND |
| 31 | OP5       | Chile        | 2015 | Tomato | 1 | 1 | 1  | 4 | ND |
| 31 | OP7       | Chile        | 2015 | Tomato | 1 | 1 | 1  | 4 | ND |
| 17 | VKMAc1403 | USA          | 2017 | Tomato | 9 | 6 | 9  | 1 | 1  |
| 31 | VL368     | Chile        | 2007 | Tomato | 1 | 1 | 1  | 4 | ND |
| 31 | VL431     | Chile        | 2009 | Tomato | 1 | 1 | 1  | 4 | ND |
| 31 | VL464     | Chile        | 2010 | Tomato | 1 | 1 | 1  | 4 | ND |
| 31 | VL478     | Chile        | 2010 | Tomato | 1 | 1 | 1  | 4 | ND |
| 31 | VL487     | Chile        | 2011 | Tomato | 1 | 1 | 1  | 4 | ND |
| 31 | VL493     | Chile        | 2011 | Tomato | 1 | 1 | 1  | 4 | ND |
| 1  | VL527     | Chile        | 2012 | Tomato | 3 | 6 | 15 | 1 | ND |
| 31 | VL531     | Chile        | 2012 | Tomato | 1 | 1 | 1  | 4 | ND |
| 31 | VL533     | Chile        | 2012 | Tomato | 1 | 1 | 1  | 4 | ND |
| 1  | VL542     | Chile        | 2013 | Tomato | 3 | 6 | 15 | 1 | ND |
| 31 | VLC31     | Chile        | 1997 | Tomato | 1 | 1 | 1  | 4 | ND |

---

|    |       |       |      |        |   |   |    |   |    |
|----|-------|-------|------|--------|---|---|----|---|----|
| 31 | VLC78 | Chile | 1999 | Tomato | 1 | 1 | 1  | 4 | ND |
| 31 | VO407 | Chile | 2009 | Tomato | 1 | 1 | 1  | 4 | ND |
| 31 | VQ143 | Chile | 2000 | Tomato | 1 | 1 | 1  | 4 | ND |
| 31 | VQ28  | Chile | 1996 | Tomato | 1 | 1 | 1  | 4 | ND |
| 1  | VQ316 | Chile | 2004 | Tomato | 3 | 6 | 15 | 1 | ND |
| 31 | VQ381 | Chile | 2008 | Tomato | 1 | 1 | 1  | 4 | ND |
| 31 | VQ477 | Chile | 2010 | Tomato | 1 | 1 | 1  | 4 | ND |
| 31 | VQ519 | Chile | 2011 | Tomato | 1 | 1 | 1  | 4 | ND |
| 31 | VQ59  | Chile | 1998 | Tomato | 1 | 1 | 1  | 4 | ND |

---

ND: Not determined
